# Supplementary material for: Closed State Structure of the Pore Revealed by Uncoupled Shaker K+ Channel
Source: Research Square preprint supplement (doi:10.21203/rs.3.rs-6406486/v1), 2025-05-08
Supplement: Supplementary file 1 [file 809a418695f22b360d36be24.docx]

**Extended Data**

**Closed State Structure of the Pore Revealed by Uncoupled Shaker K+ Channel**

**Authors and Affiliations**

Yichen Liu1,5, Carlos Bassetto2,5, Gustavo Contreras3,5, Eduardo Perozo3*, Francisco Bezanilla3, 4*

1 Committee on Neurobiology, University of Chicago, Chicago, IL, USA.

2 Department of Physics and Astronomy, The University of Texas at San Antonio, San Antonio, TX, USA.

3 Department of Biochemistry and Molecular Biology, University of Chicago, Chicago, IL, USA.

4 Centro Interdisciplinario de Neurociencias de Valparaiso, Valparaiso, Chile.

5 These authors contributed equally: Yichen Liu, Carlos Bassetto and Gustavo Contreras.

*Corresponding author: Francisco Bezanilla: fbezanilla@uchicago.edu, Eduardo Perozo: Eperozo@uchicago.edu

**
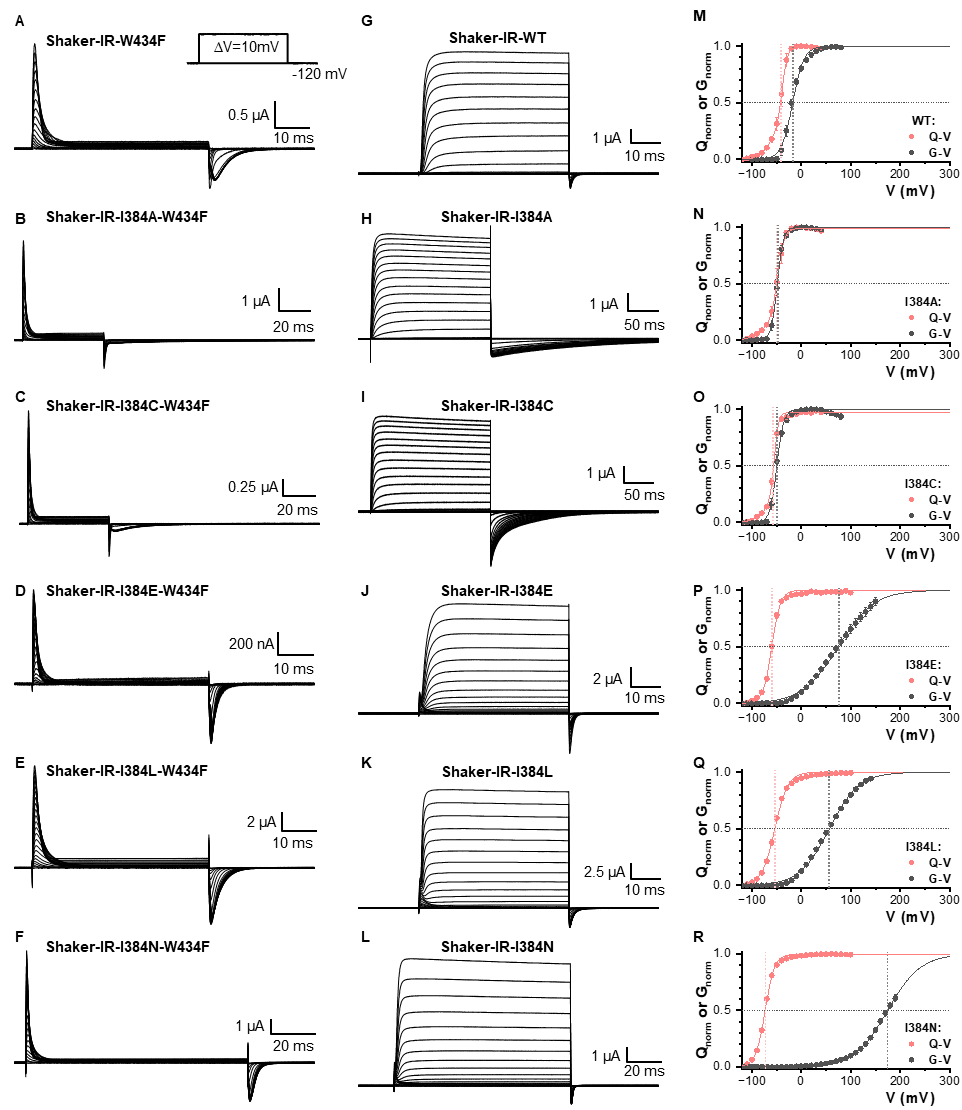
** **Extended Data Figure 1**

**Extended Data Figure 1.** Gating current, ionic current and QV-GV curve comparison for all the I384 mutants in Shaker-IR potassium channel. Representative gating currents for WT **(A)**, I384A **(B)**, I384C **(C)**, I384E **(D)**, I384L **(E)**, and I384N **(F)**. Representative ionic currents for WT **(G)**, I384A **(H)**, I384C **(I)**, I384E **(J)**, I384L **(K)**, and I384N **(L)**. Note that the gating current experiments were conducted with W434F background. The comparison of the QV/GV WT **(M)** curve indicates that I384A **(N)** and I384C **(O)** strengthen the coupling while I384E **(P)**, I384L **(Q)** and I384N **(R)** weaken the coupling.


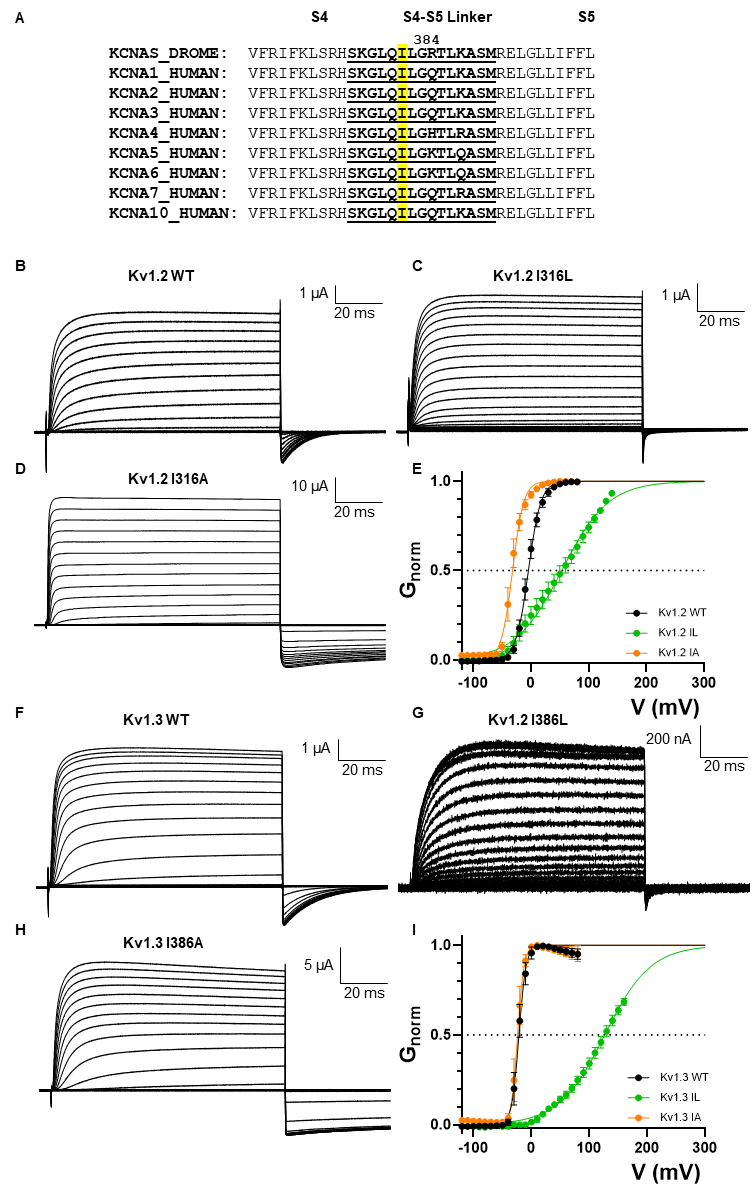
 **Extended Data Figure 2**

**Extended Data Figure 2.** Conserved Isoleucine that controls EMC in Kv1 family. **A)** Sequence alignment of the Shaker potassium channel with human Kv1 channels. I384 is conserved across all the channels. **B)-D)** Results from hKv1.2 mutating the equivalent isoleucine. **F)-I)** Results from hKv1.3 mutating the equivalent isoleucine. Similar behaviors were seen on both channels.

**Extended Data Figure 3**

**
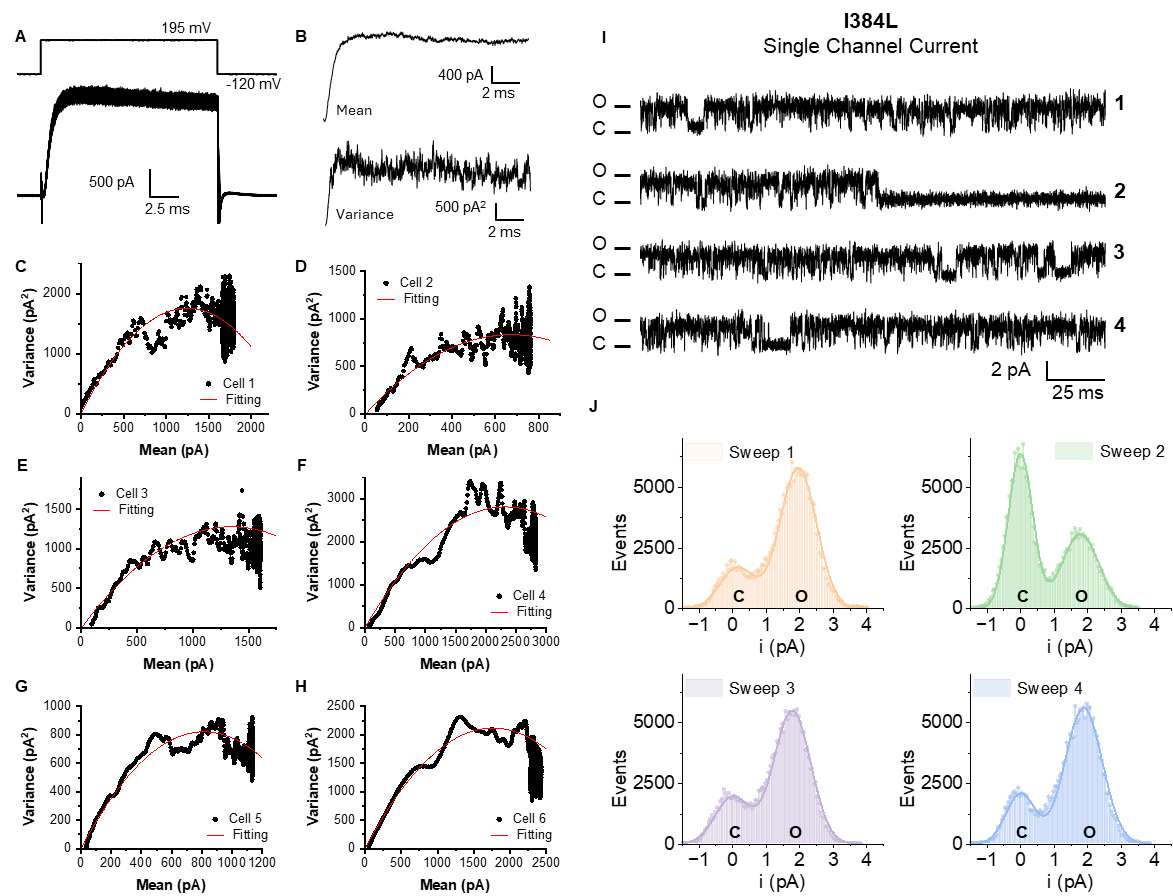
**

**Extended Data Figure 3.** Noise analysis and Single channel recording of I384L. Six independent noise analysis experiments were shown with their fitting parameters **(A-H)**. Voltage protocol is inset in **A**. Representative 150 current traces overlapped are shown in **A)** and in **B)** is depicted the Mean and variance from those recordings. **I)** Four representative current traces for single channel records at 195mV, and increased flickering behavior was observed. **J)** Histogram of the single channel recording traces shown in **I)**.


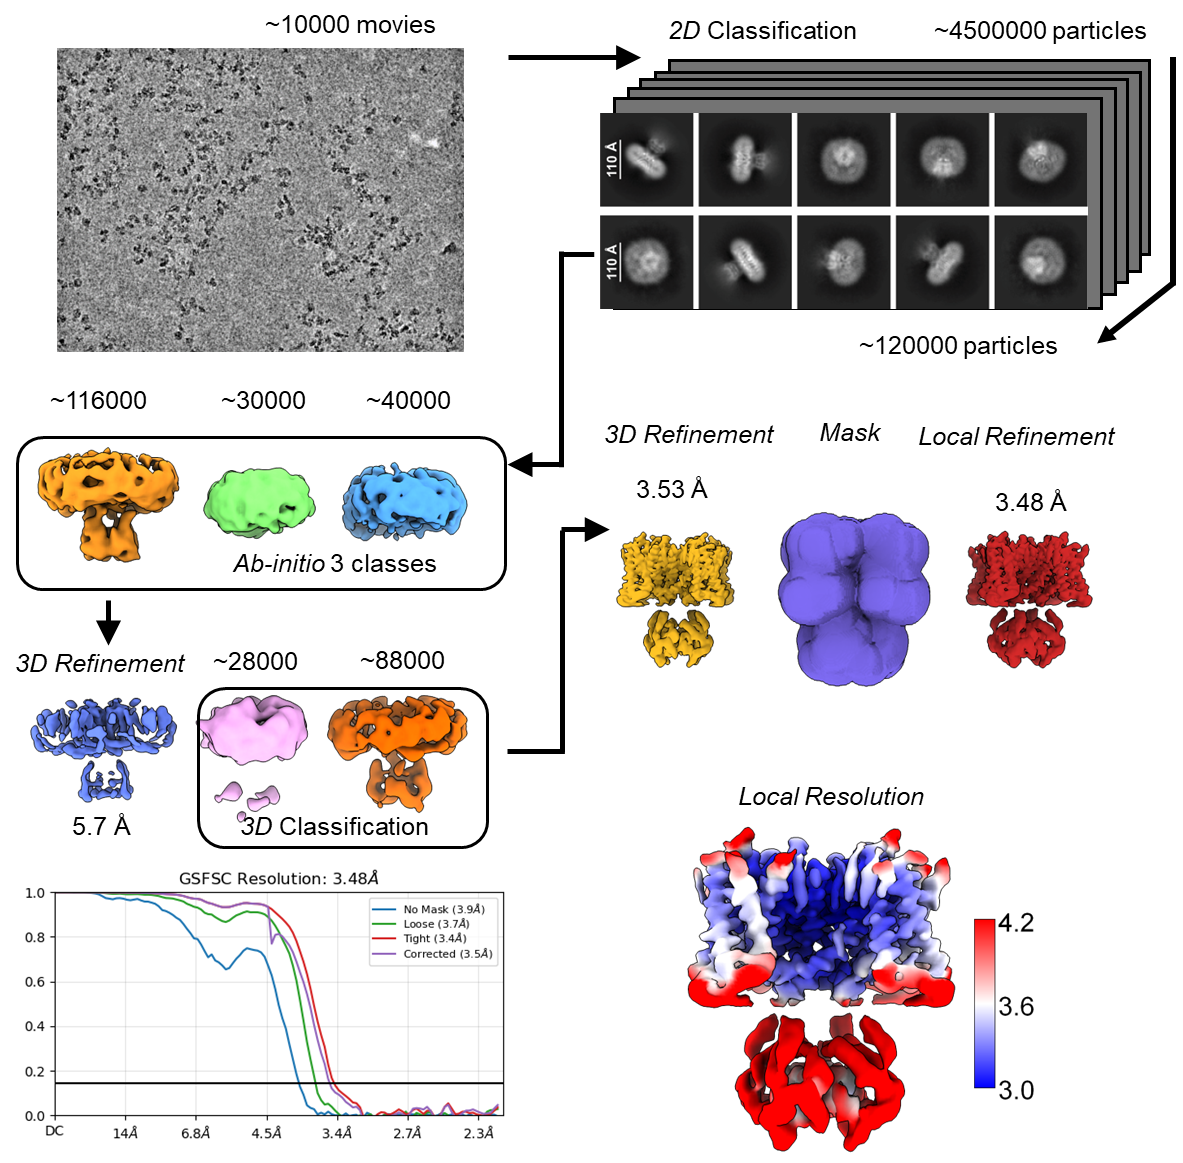
 **Extended Data Figure 4**

**Extended Data Figure 4.** Pipeline of the structural determination for Shaker-IR-I384R. Resolution curve and local resolution map.


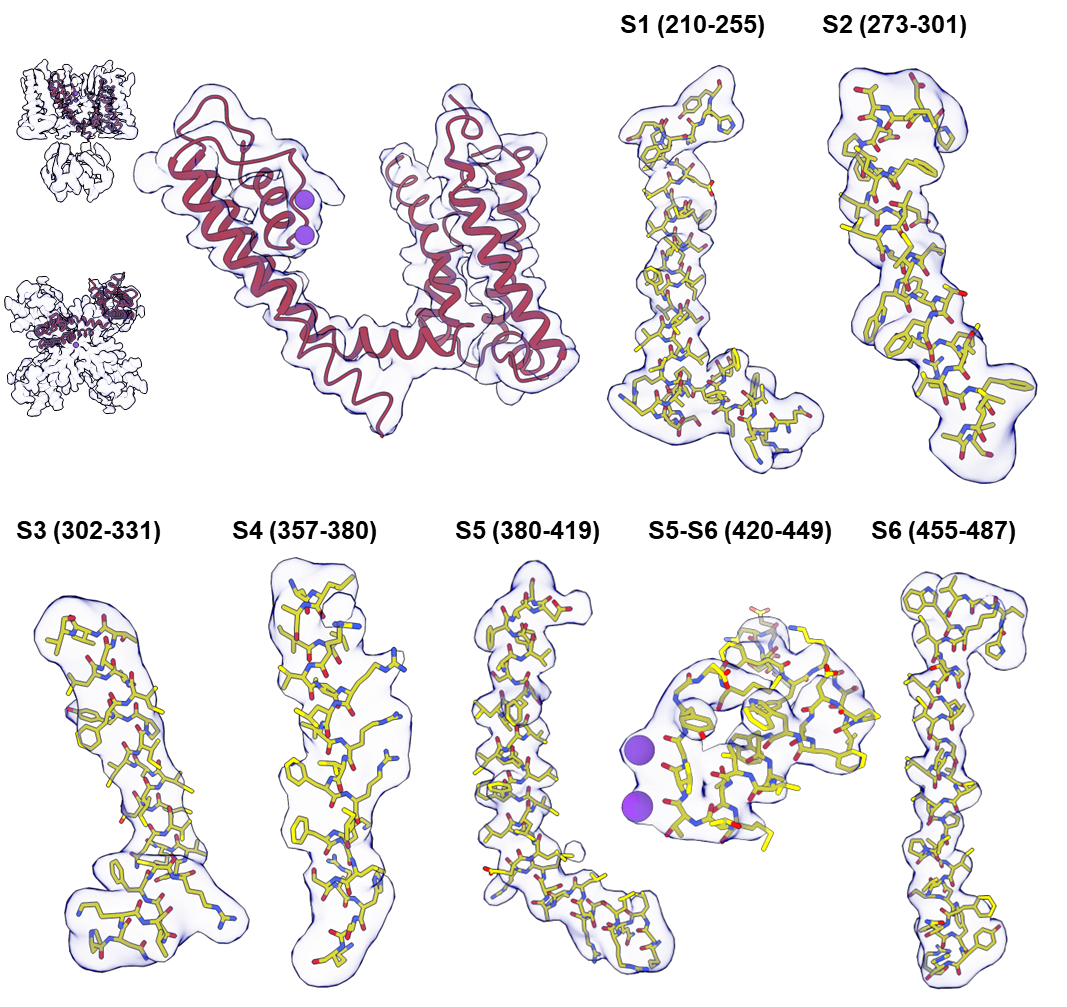
 **Extended Data Figure 5**

**Extended Data Figure 5.** Comparison of atomic models and the densities.

**Extended Data Figure 6**

**
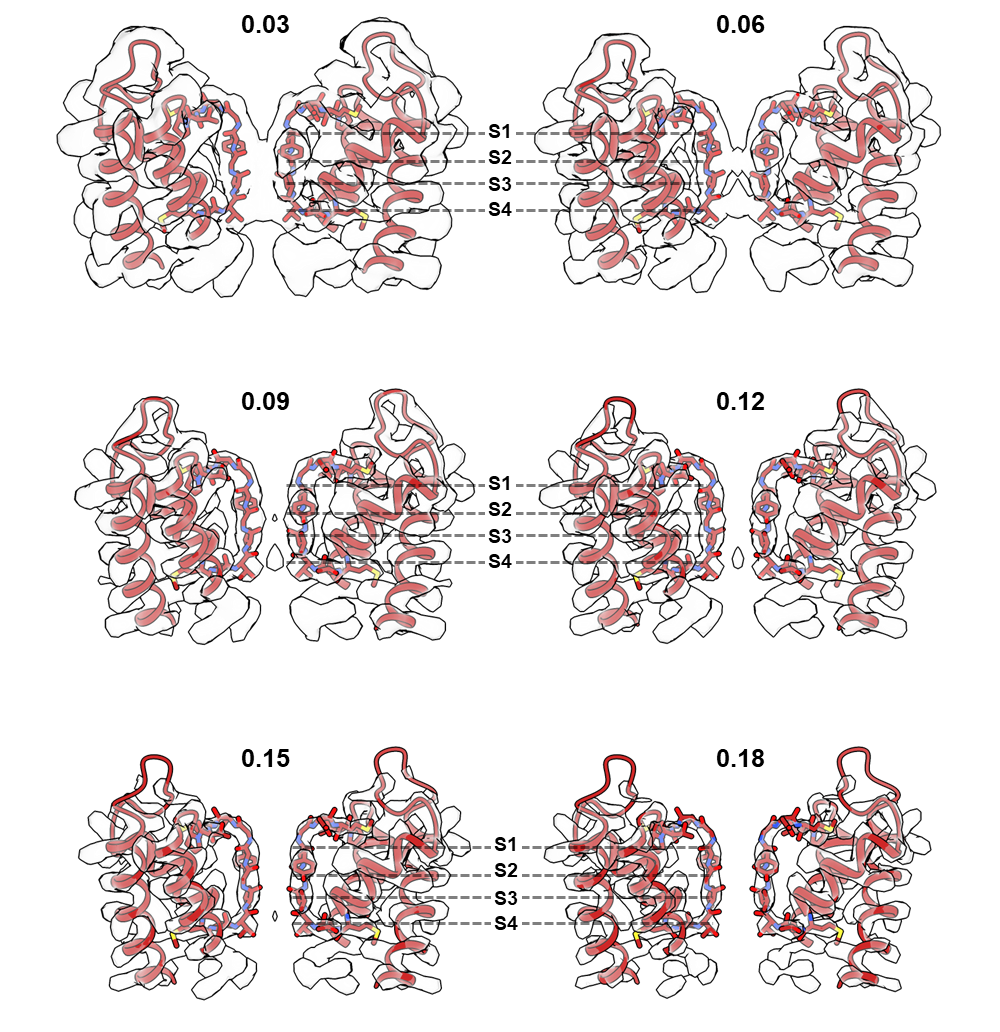
**

**Extended Data Figure 6.** Atomic model overlaid with the density map plotted with variable iso-surface value.

**Extended Data Figure 7**


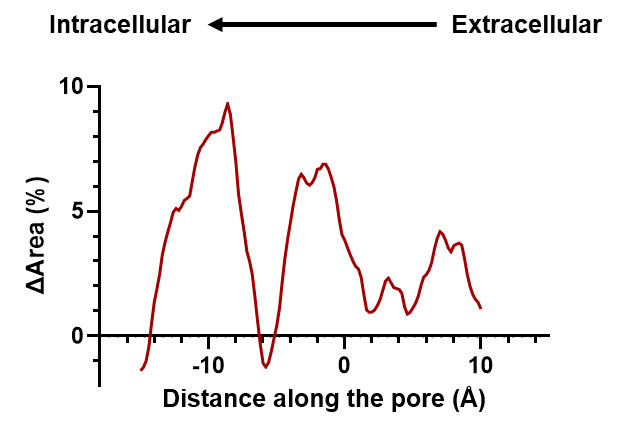


**Extended Data Figure 7.** Percent area increases the open state compared to the closed state along the membrane. Positive value indicates expansion in open state.


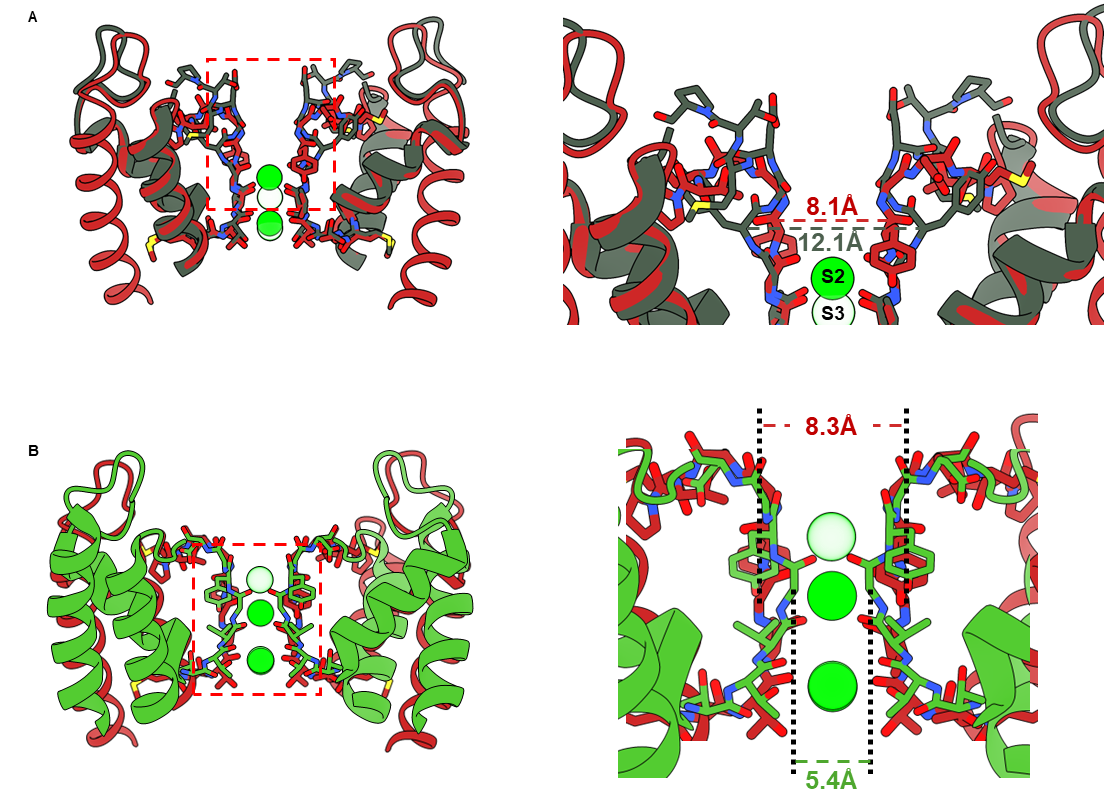
 **Extended Data Figure 8**

**Extended Data Figure 8.** Comparison of the noncanonical filter with dilated filter (PDB:8ETO) **A), B)** and pinched filter (PDB:3F5W) **C), D)**. Note that the noncanonical filter is different from both conformations.

**Extended Data Tables**

**Extended Data Table 1: Fitting parameters for GV curves**

|  | **V1/2** | | | **z** | | |
| --- | --- | --- | --- | --- | --- | --- |
| **WT** | -17.70 | ± | 0.73 | 2.22 | ± | 0.13 |
| **I384A** | -48.70 | ± | 0.26 | 4.01 | ± | 0.15 |
| **I384C** | -49.80 | ± | 0.62 | 3.64 | ± | 0.29 |
| **I384E** | 74.45 | ± | 0.91 | 0.70 | ± | 0.02 |
| **I384L** | 56.12 | ± | 0.70 | 0.84 | ± | 0.02 |
| **I384N** | 174.33 | ± | 0.25 | 0.76 | ± | 0.01 |

**Extended Data Table 2: Fitting parameters for QV curves**

|  | **V1** | | | **z1** | | | **v2** | | | **z2** | | | **N** | | |
| --- | --- | --- | --- | --- | --- | --- | --- | --- | --- | --- | --- | --- | --- | --- | --- |
| **WT** | -62.20 | ± | 1.08 | 2.10 | ± | 0.14 | -39.26 | ± | 0.41 | 4.51 | ± | 0.22 | 0.15 | ± | 0.01 |
| **I384A** | -63.81 | ± | 3.84 | 1.46 | ± | 0.29 | -49.09 | ± | 1.79 | 3.39 | ± | 0.34 | 0.20 | ± | 0.02 |
| **I384C** | -69.31 | ± | 3.07 | 1.79 | ± | 0.30 | -56.26 | ± | 1.26 | 5.19 | ± | 0.80 | 0.14 | ± | 0.02 |

|  | **V1/2** | | | **z** | | |
| --- | --- | --- | --- | --- | --- | --- |
| **I384E** | -59.92 | ± | 0.51 | 2.84 | ± | 0.14 |
| **I384L** | -53.89 | ± | 0.56 | 1.92 | ± | 0.07 |
| **I384N** | -73.32 | ± | 0.33 | 2.61 | ± | 0.08 |
| **I384R** | -76.82 | ± | 0.24 | 2.85 | ± | 0.07 |

**Extended Data Table 3: Fitting parameters for noise analysis**

| **Cell** |  | **Fitting** | | **Vm (mV)** | **Vrev (mV)** | **PoMax** | **Mean (pA)** | **Y (Single)** | **pS** |
| --- | --- | --- | --- | --- | --- | --- | --- | --- | --- |
|  |  | **Value** | **Error** |  |  |  |  |  |  |
| I384L_04-04-24-001 | I (pA) | 2.01 | 0.03 | 160.00 | -57.00 | 0.70 | 1139.90 | 0.00 | 13.27 |
|  | N | 809.71 | 24.69 |  |  |  |  |  |  |
| I384L_04-04-24-002 | I (pA) | 2.40 | 0.03 | 160.00 | -57.00 | 0.69 | 2434.20 | 0.00 | 16.02 |
|  | N | 1475.23 | 37.67 |  |  |  |  |  |  |
| I384L_04-04-24-003 | I (pA) | 2.42 | 0.06 | 180.00 | -57.00 | 0.61 | 2835.10 | 0.00 | 16.75 |
|  | N | 1922.18 | 98.98 |  |  |  |  |  |  |
| I384L_04-04-24-005 | I (pA) | 1.89 | 0.07 | 180.00 | -57.00 | 0.60 | 1609.00 | 0.00 | 13.38 |
|  | N | 1421.08 | 223.78 |  |  |  |  |  |  |
| I384L_04-04-24-006 | I (pA) | 2.48 | 0.07 | 195.00 | -57.00 | 0.57 | 764.04 | 0.00 | 17.30 |
|  | N | 543.38 | 39.13 |  |  |  |  |  |  |
| I384L_04-04-24-009 | I (pA) | 2.75 | 0.04 | 195.00 | -57.00 | 0.64 | 500.06 | 0.00 | 17.12 |
|  | N | 285.07 | 7.87 |  |  |  |  |  |  |
| I384L_04-12-24-008 | I (pA) | 2.82 | 0.07 | 195.00 | -57.00 | 0.72 | 1798.00 | 0.00 | 15.50 |
|  | N | 885.83 | 43.38 |  |  |  |  |  |  |

**Extended Data Table 4: Fitting parameters for single channel analysis**

|  | **Sweep 1** | | **Sweep 2** | | **Sweep 3** | | **Sweep 4** | |
| --- | --- | --- | --- | --- | --- | --- | --- | --- |
|  | **Value** | **error** | **Value** | **error** | **Value** | **error** | **Value** | **error** |
| **µ1** | 3.93 | 0.01 | 3.75 | 0.01 | 3.94 | 0.01 | 3.99 | 0.01 |
| **σ1** | 0.77 | 0.01 | 0.78 | 0.01 | 0.78 | 0.01 | 0.79 | 0.01 |
| **A1** | 22399.67 | 243.33 | 11969.20 | 182.66 | 21546.90 | 235.23 | 22217.59 | 255.66 |
| **µ2** | 2.11 | 0.02 | 1.97 | 0.00 | 2.16 | 0.02 | 2.11 | 0.02 |
| **σ2** | 0.73 | 0.03 | 0.51 | 0.01 | 0.73 | 0.03 | 0.62 | 0.03 |
| **A2** | 6187.80 | 238.43 | 16331.76 | 150.59 | 7126.41 | 229.39 | 6420.97 | 228.52 |
